# Supplementary material
Source: Springer Nature journal article supplement (https://www.springermedizin.de/resource/supplementary/12936_2008_852_MOESM1_ESM.pdf/9548400)

percentage of Vegetable farmers respecting or not the recommended doses

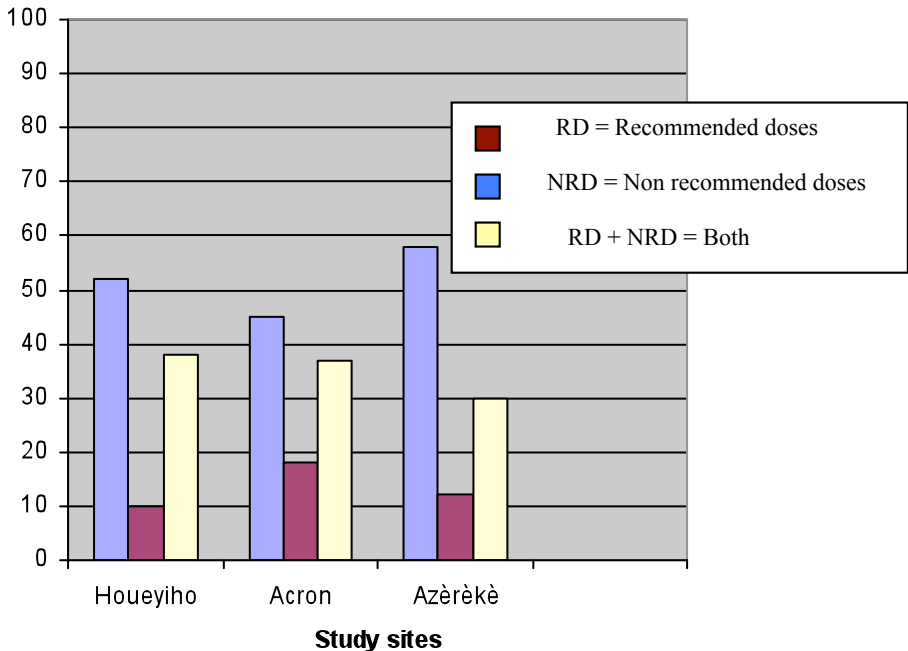

Supplement: MOESM1 [file 9548400]
